# Supplementary material for: Enkephalin-encoding herpes simplex virus-1 decreases inflammation and hotplate sensitivity in a chronic pancreatitis model
Source: PubMed Central journal article supplement (PMC2292157; doi:10.1186/1744-8069-4-8), 2008-02-28
Supplement: 1744-8069-4-8-S2.pdf [file 1744-8069-4-8-S2.pdf]

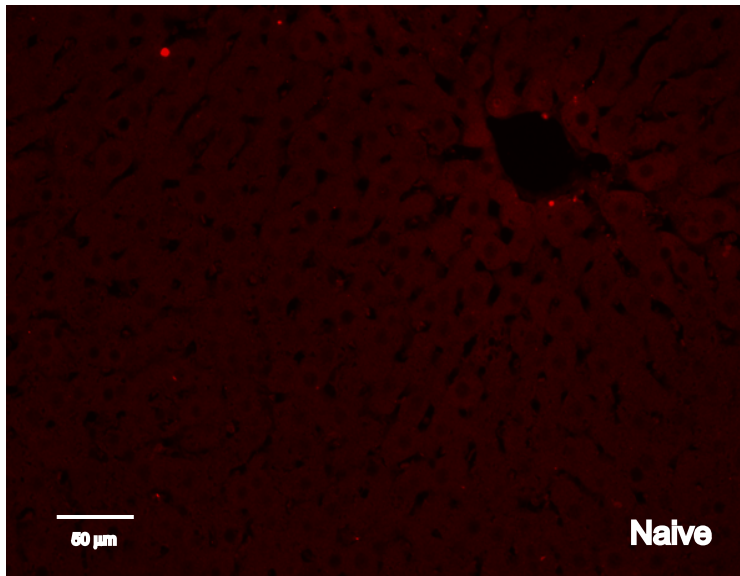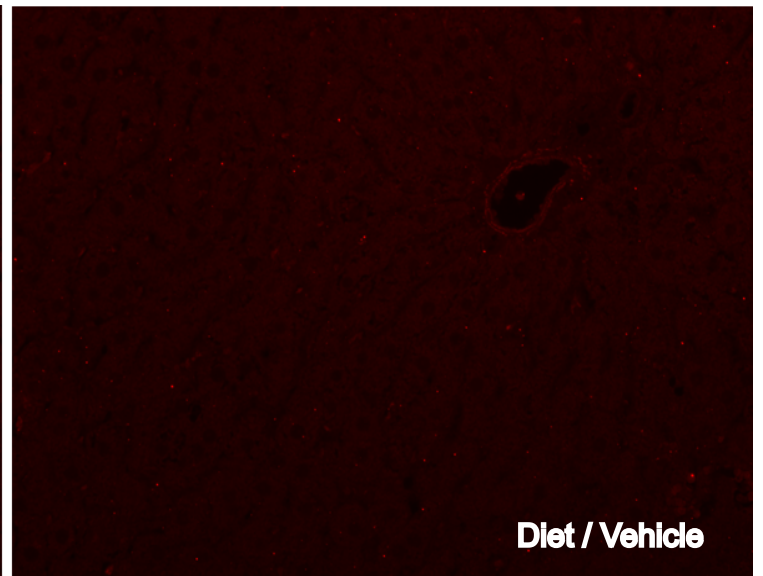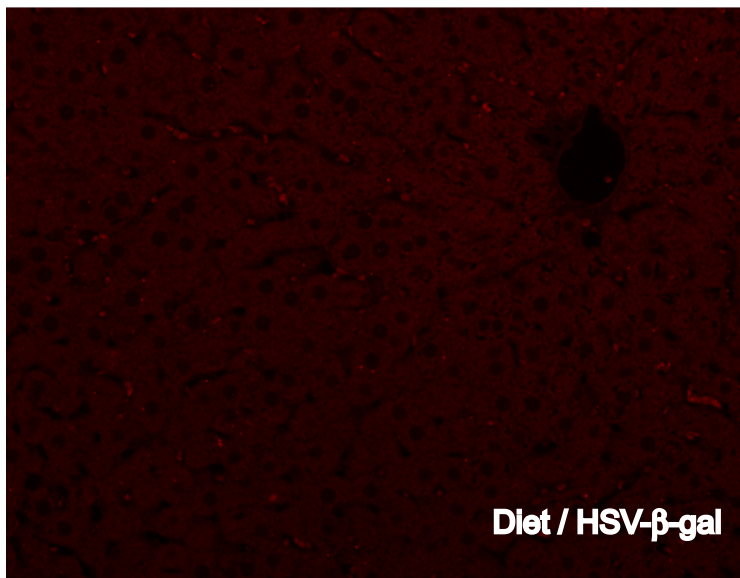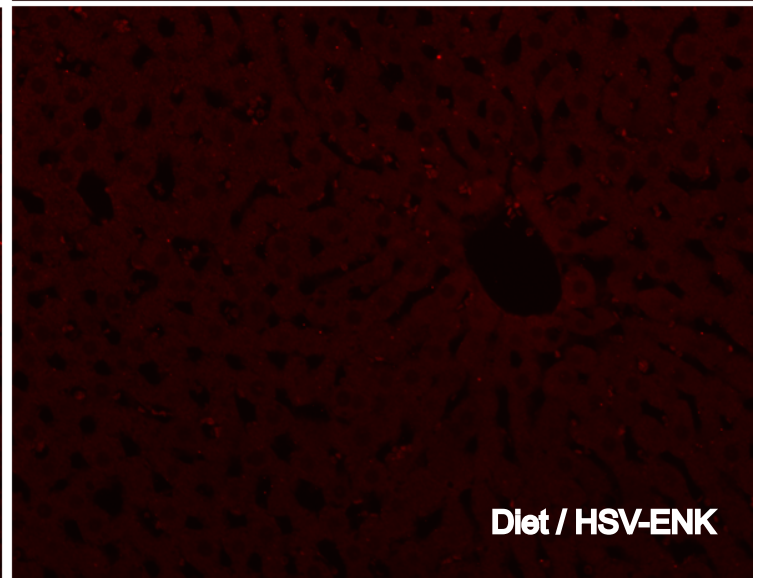

## HSV-1 in Liver
